# Supplementary material for: Conserved effector families of Phytophthora species drive NLR-mediated nonhost resistance in plants
Source: Research Square preprint supplement (doi:10.21203/rs.3.rs-4272480/v1), 2024-04-30
Supplement: Supplementary file 1 [file 2e27e94f8207a3cc897f039c.xlsx]

## Sheet: Table 1
Supplementary Table 1. List of avirulence effectors used in this study
Name	PITG locus_tag	UniprotID (Swiss-Prot)
Avr1	PITG_16663	sp_D0NVB5_AVR1_PHYIT
Avr2	PITG_22870
Avr3aEM	PITG_14371	sp_D0NPN8_A3AEM_PHYIT
Avr3aKI	PITG_14371	sp_E2DWQ7_A3AKI_PHYIN
Avr3b	PITG_18215	sp_D0NXM3_SFI7_PHYIT
Avr4	PITG_07387	sp_B1NNT7_AVR4_PHYIT
Avr8	PITG_07558
Avr10	PITG_11484	sp_D0NIW0_AVR10_PHYIT
Avramr1	PITG_07569
Avramr3	PITG_21190
Avrblb1	PITG_21388	sp_D0P3S7_ABLB1_PHYIT
Avrblb2	PITG_04085
Avrblb2	PITG_04086
Avrblb2	PITG_04090
Avrblb2	PITG_18683	sp_D0NZB7_BLB2B_PHYIT
Avrblb2	PITG_20300	sp_D0P1A8_ABLB2_PHYIT
Avrblb2	PITG_20301
Avrblb2	PITG_20303	sp_D0P1B2_SFI8_PHYIT
Avrvnt1	PITG_16294	sp_D0NTY1_AVNT1_PHYIT

## Sheet: Table 2
Supplementary Table 2. The number of homologous effectors in selected species
Species	Prefix	Reported host plants	Homolgous RXLR effectors	Database	Download URL
Phytophthora infestans	PHIF	Potato, tomato	124	OGOB	https://ogob.ie/v1/gob/data.html
Phytophthora parasitica	PHPA	Potato, egg plant, pepper, tobacco	70	OGOB	https://ogob.ie/v1/gob/data.html
Phytophthora cactorum	PHCR	Strawberry	35	NCBI	https://www.ncbi.nlm.nih.gov/datasets/genome/GCA_016864655.1/
Phytophthora megakarya	PHMG	Cocoa	208	NCBI	https://www.ncbi.nlm.nih.gov/datasets/genome/GCA_002215365.1/
Phytophthora palmivora	PHPV	Phalaenopsis	70	NCBI	https://www.ncbi.nlm.nih.gov/datasets/genome/GCA_002911725.1/
Phytophthora capsici	PHCA	Pepper, pumpkin, cucumber	32	OGOB	https://ogob.ie/v1/gob/data.html
Phytophthora sojae	PHSO	Soybean	74	OGOB	https://ogob.ie/v1/gob/data.html
Phytophthora ramorum	PHRA	Oak tree	27	OGOB	https://ogob.ie/v1/gob/data.html
Hyaloperonospora arabidopsidis	HYAP	Arabidopsis	2	OGOB	https://ogob.ie/v1/gob/data.html
Phytophthora kernoviae	PHKE	Beech tree, Azalea	3	OGOB	https://ogob.ie/v1/gob/data.html
Phytopythium vexans	PPVX	Citrus	0	OGOB	https://ogob.ie/v1/gob/data.html
Pythium ultimum	PYUU	Corn, potato	0	OGOB	https://ogob.ie/v1/gob/data.html

## Sheet: Table 3
Supplementary Table 3. Classification of homologous effectors used in this study
PhyloGroup	GeneID	Species_Prefix	OG_ID	AA_Length	RXLR_Type	RXLR_Motif	SigP_Str_Pos	RXLR_Str_Pos	EER_Str_Pos	Num_WY	Functional_Avr
Avr1	PITG_16663	PHIF	OG0001471	208	Sig-RXLR-WY	RQLR	22	41	NA	2	Ref
Avr1	KAG2771952.1	PHCR	OG0001471	151	Sig-hdRXLR-WY	GWLK	22	114	NA	2
Avr1	KAG2773429.1	PHCR	OG0001471	202	Sig-RXLR-dEER-WY	RLLR	22	41	52	2
Avr1	OWY91070.1	PHMG	OG0001471	66	hdRXLR-WY	KIK	NA	4	NA	2
Avr1	OWY97836.1	PHMG	OG0001471	232	Sig-RXLR-dEER-WY	RLLR	22	49	65	2
Avr1	OWY98168.1	PHMG	OG0001471	165	WY	NA	NA	NA	NA	1
Avr1	OWZ15361.1	PHMG	OG0001471	212	RXLR-dEER-WY	RLLR	NA	29	45	2
Avr1	OWZ16165.1	PHMG	OG0001471	214	Sig-RXLR-dEER-WY	RVLR	22	43	59	1
Avr1	PHYCA_113929	PHCA	OG0001471	188	Sig-RXLR-dEER-WY	RLLR	22	28	37	2
Avr1	PHYCA_129759	PHCA	OG0001471	188	Sig-RXLR-dEER-WY	RLLR	22	28	37	2
Avr1	PHYCA_133479	PHCA	OG0001471	183	Sig-RXLR-dEER-WY	RLLR	17	23	32	2
Avr1	PHYCA_567591	PHCA	OG0001471	188	Sig-RXLR-dEER-WY	RLLR	22	28	37	2
Avr1	PHYSO_301880	PHSO	OG0001471	124	hdRXLR-WY	KYN	NA	77	NA	1
Avr1	PHYSO_415892	PHSO	OG0001471	123	hdRXLR-WY	KNLR	NA	94	NA	2
Avr1	PITG_06432	PHIF	OG0001471	170	Sig-RXLR-WY	RQLR	22	41	NA	2
Avr1	POM58004.1	PHPV	OG0001471	213	Sig-RXLR-dEER-WY	RLLR	25	46	62	2
Avr1	POM66420.1	PHPV	OG0001471	245	Sig-RXLR-dEER-WY	RLLR	25	46	62	2
Avr1	POM71625.1	PHPV	OG0001471	213	Sig-RXLR-dEER-WY	RLLR	25	46	62	2
Avr1	PPTG_12206	PHPA	OG0001471	231	Sig-RXLR-WY	RLLR	22	41	NA	2
Avr1	PPTG_12265	PHPA	OG0001471	57	hdRXLR-WY	GWLK	NA	46	NA	1
Avr1	PPTG_15216	PHPA	OG0001471	203	Sig-RXLR-WY	RLLR	22	41	NA	1
Avr1	PPTG_20226	PHPA	OG0001471	258	RXLR-WY	RLLR	NA	84	NA	2
Avr2	PITG_22870	PHIF	OG0013552	116	Sig-RXLR-dEER	RLLR	20	49	63	NA	Ref
Avr2	KAG2769934.1	PHCR	OG0000217	67	Sig-hdRXLR	RSMK	21	59	NA	NA
Avr2	KAG2769938.1	PHCR	OG0000217	116	Sig-RXLR-dEER	RHLR	21	48	60,66	NA
Avr2	OWY90528.1	PHMG	OG0000217	78	hdRXLR	KLN	NA	58	NA	NA
Avr2	OWY91724.1	PHMG	OG0000217	112	Sig-RXLR-dEER	RLLR	23	43	60	NA
Avr2	OWY92544.1	PHMG	OG0000217	126	Sig-RXLR-dEER	RLLR	20	46	69	NA
Avr2	OWY94660.1	PHMG	OG0000217	106	Sig-RXLR-dEER	RQLR	19	50	67	NA
Avr2	OWY95422.1	PHMG	OG0000217	121	Sig-RXLR-dEER	RRLR	20	50	67	NA
Avr2	OWY95700.1	PHMG	OG0000217	120	Sig-RXLR-dEER	RHLR	21	50	67	NA
Avr2	OWY97701.1	PHMG	OG0000217	112	Sig-RXLR-dEER	RLLR	21	51	69	NA
Avr2	OWY97906.1	PHMG	OG0000217	119	Sig-RXLR-dEER	RLLR	21	49	66	NA
Avr2	OWY98894.1	PHMG	OG0000217	111	Sig-RXLR-dEER	RKLR	20	41	58	NA
Avr2	OWY99514.1	PHMG	OG0000217	116	Sig-RXLR	QKLR	19	103	NA	NA
Avr2	OWZ01187.1	PHMG	OG0000217	118	Sig-RXLR-dEER	RLLR	21	49	67	NA
Avr2	OWZ01677.1	PHMG	OG0000217	120	Sig-RXLR-dEER	RLLR	20	49	67	NA
Avr2	OWZ01782.1	PHMG	OG0000217	123	Sig-RXLR-dEER	RQLR	18	44	61	NA
Avr2	OWZ02475.1	PHMG	OG0000217	126	Sig-RXLR-dEER	RLLR	21	46	69	NA
Avr2	OWZ04874.1	PHMG	OG0000217	120	Sig-RXLR-dEER	RHLR	21	50	67	NA
Avr2	OWZ04961.1	PHMG	OG0000217	123	Sig-RXLR-dEER	RLLR	21	51	72	NA
Avr2	OWZ08508.1	PHMG	OG0000217	85	Sig-RXLR-dEER	RLLR	19	47	64	NA
Avr2	OWZ08995.1	PHMG	OG0000217	126	Sig-RXLR	RLLR	21	50	NA	NA
Avr2	OWZ09190.1	PHMG	OG0000217	118	Sig-RXLR-dEER	RLLR	21	50	67	NA
Avr2	OWZ09330.1	PHMG	OG0000217	133	Sig-RXLR-dEER	RQLR	19	50	67	NA
Avr2	OWZ10663.1	PHMG	OG0000217	116	Sig-RXLR-dEER	RELR	21	43	60	NA
Avr2	OWZ12262.1	PHMG	OG0000217	120	Sig-RXLR-dEER	RLLR	21	51	69	NA
Avr2	OWZ12390.1	PHMG	OG0000217	119	Sig-RXLR-dEER	RLLR	21	50	67	NA
Avr2	OWZ12432.1	PHMG	OG0000217	119	Sig-RXLR-dEER	RHLR	21	50	66	NA
Avr2	OWZ13206.1	PHMG	OG0000217	198	RXLR-dEER	HLLR	NA	79	94	NA
Avr2	OWZ13374.1	PHMG	OG0000217	99	RXLR-dEER	RLLR	NA	26	43	NA
Avr2	OWZ13408.1	PHMG	OG0000217	121	Sig-RXLR-dEER	RLLR	21	50	67	NA
Avr2	OWZ13970.1	PHMG	OG0000217	119	Sig-RXLR-dEER	RLLR	21	49	66	NA
Avr2	OWZ14354.1	PHMG	OG0000217	121	Sig-RXLR-dEER	RLLR	20	46	65	NA
Avr2	OWZ17362.1	PHMG	OG0000217	133	Sig-RXLR-dEER	RQLR	20	50	67	NA
Avr2	OWZ17424.1	PHMG	OG0000217	119	Sig-RXLR-dEER	RNLR	21	50	67	NA
Avr2	OWZ18728.1	PHMG	OG0000217	120	Sig-RXLR-dEER	RLLR	23	49	67	NA
Avr2	OWZ19652.1	PHMG	OG0000217	112	Sig-hdRXLR	RLR	19	100	NA	NA
Avr2	OWZ20169.1	PHMG	OG0000217	119	Sig-RXLR-dEER	RLLR	20	49	66	NA
Avr2	OWZ21806.1	PHMG	OG0000217	124	Sig-RXLR-dEER	RLLR	19	50	74	NA
Avr2	OWZ22247.1	PHMG	OG0000217	126	Sig-RXLR-dEER	RLLR	20	46	69	NA
Avr2	OWZ22511.1	PHMG	OG0000217	119	Sig-RXLR-dEER	RQLR	19	50	67	NA
Avr2	PHYCA_17159	PHCA	OG0000217	145	Sig-RXLR-dEER	RMLR	21	50	90	NA
Avr2	PHYCA_17162	PHCA	OG0000217	139	Sig-RXLR-dEER	RMLR	21	50	84	NA
Avr2	PHYCA_20942	PHCA	OG0000217	104	Sig-RXLR-dEER	RMLR	21	40	58	NA
Avr2	PHYCA_509817	PHCA	OG0000217	121	Sig-hdRXLR	KLIK	21	109	NA	NA
Avr2	PHYRA_76324	PHRA	OG0000217	113	Sig-RXLR-dEER	RHLR	21	51	59	NA
Avr2	PHYSO_284368	PHSO	OG0000217	106	Sig-RXLR-dEER	GMLR	21	51	64	NA
Avr2	PHYSO_285135	PHSO	OG0000217	110	Sig-RXLR	RQLR	21	50	NA	NA
Avr2	PHYSO_285700	PHSO	OG0000217	120	Sig-RXLR-dEER	RLLR	19	45	61	NA
Avr2	PHYSO_286162	PHSO	OG0000217	141	Sig-RXLR-dEER	RMLR	21	54	70	NA
Avr2	PHYSO_286176	PHSO	OG0000217	111	Sig-RXLR-dEER	RHLR	21	50	69	NA
Avr2	PHYSO_286184	PHSO	OG0000217	117	Sig-RXLR-dEER	RALR	21	50	63	NA
Avr2	PHYSO_286791	PHSO	OG0000217	120	Sig-hdRXLR	GIR	21	112	NA	NA
Avr2	PHYSO_286793	PHSO	OG0000217	131	Sig-RXLR-dEER	RMLR	19	54	70	NA
Avr2	PHYSO_288454	PHSO	OG0000217	89	Sig-RXLR-dEER	RILR	20	50	60	NA
Avr2	PHYSO_288467	PHSO	OG0000217	111	Sig-RXLR-dEER	RMLR	21	51	64	NA
Avr2	PHYSO_288469	PHSO	OG0000217	111	Sig-RXLR-dEER	RMLR	21	51	64	NA
Avr2	PHYSO_288471	PHSO	OG0000217	110	Sig-RXLR-dEER	RMLR	21	51	63	NA
Avr2	PHYSO_288478	PHSO	OG0000217	66	hdRXLR	GIN	NA	63	NA	NA
Avr2	PHYSO_288481	PHSO	OG0000217	72	Sig-RXLR-dEER	RMLR	19	50	63	NA
Avr2	PHYSO_288482	PHSO	OG0000217	116	Sig-RXLR-dEER	RMLR	18	48	62	NA
Avr2	PHYSO_288494	PHSO	OG0000217	120	Sig-RXLR-dEER	RMLR	19	50	64	NA
Avr2	PHYSO_355041	PHSO	OG0000217	123	Sig-RXLR	RLLR	21	50	NA	NA
Avr2	PHYSO_460164	PHSO	OG0000217	61	Sig-RXLR	RMLR	19	50	NA	NA
Avr2	PHYSO_463855	PHSO	OG0000217	60	Sig-hdRXLR	RSVK	17	21	NA	NA
Avr2	PITG_02387	PHIF	OG0000217	108	Sig-RXLR-dEER	RMLR	20	48	65	NA
Avr2	PITG_13550	PHIF	OG0000217	122	Sig-RXLR-dEER	RLLR	20	51	69	NA
Avr2	PITG_15255	PHIF	OG0000217	127	Sig-RXLR-dEER	RILR	19	51	67	NA
Avr2	PITG_18986	PHIF	OG0000217	118	Sig-RXLR-dEER	RLLR	20	50	67	NA
Avr2	POM58688.1	PHPV	OG0000217	128	Sig-RXLR-dEER	RQLR	19	50	66	NA
Avr2	POM62425.1	PHPV	OG0000217	117	Sig-RXLR-dEER	RLLR	21	48	65	NA
Avr2	POM73987.1	PHPV	OG0000217	113	Sig-RXLR-dEER	RLLR	21	50	63	NA
Avr2	POM79138.1	PHPV	OG0000217	89	Sig-RXLR-dEER	RLLR	21	49	59	NA
Avr2	PPTG_04429	PHPA	OG0000217	112	Sig-RXLR-dEER	RLLR	19	49	62	NA
Avr2	PPTG_05125	PHPA	OG0000217	112	Sig-RXLR	QKLR	21	79	NA	NA
Avr2	PPTG_05821	PHPA	OG0000217	92	Sig-RXLR-dEER	RLLR	21	50	65	NA
Avr2	PPTG_12421	PHPA	OG0000217	104	Sig-hdRXLR	RWYK	17	76	NA	NA
Avr2	PPTG_19177	PHPA	OG0000217	115	Sig-RXLR-dEER	RLLR	21	48	62	NA
Avr2	PPTG_19866	PHPA	OG0000217	120	Sig-RXLR	RLLR	21	50	NA	NA
Avr2	PPTG_21383	PHPA	OG0000217	101	Sig-RXLR-dEER	RLLR	19	50	67	NA
Avr2	PITG_06071	PHIF	OG0011079	115	Sig-RXLR-dEER	RFLR	28	50	64	NA
Avr2	PITG_06077	PHIF	OG0011079	118	Sig-RXLR-dEER-WY	RFLR	21	50	64	1
Avr2	PITG_07482	PHIF	OG0011079	84	Sig-RXLR-dEER	RLLR	21	50	55,63	NA
Avr2	PITG_07499	PHIF	OG0011079	118	Sig-RXLR-dEER	RLLR	21	50	55,63	NA
Avr2	PITG_07500	PHIF	OG0011079	118	Sig-RXLR-dEER	RLLR	21	50	55,63	NA
Avr2	PITG_08278	PHIF	OG0011079	118	Sig-RXLR-dEER	RLLR	21	50	55,63	NA
Avr2	PITG_15972	PHIF	OG0011079	94	Sig-RXLR-dEER	RLLR	21	50	55,63	NA
Avr2	PITG_19617	PHIF	OG0011079	118	Sig-RXLR-dEER	RLLR	21	50	55,63	NA
Avr2	PITG_20025	PHIF	OG0011079	118	Sig-RXLR-dEER	RLLR	21	50	55,63	NA
Avr2	PITG_13930	PHIF	OG0011846	114	Sig-RXLR-dEER	RLLR	21	47	61	NA
Avr2	PITG_13936	PHIF	OG0011846	96	Sig-RXLR	RLLR	21	47	NA	NA
Avr2	PITG_13940	PHIF	OG0011846	114	Sig-RXLR-dEER	RLLR	19	47	61	NA
Avr2	PITG_13956	PHIF	OG0011846	114	Sig-RXLR-dEER	RLLR	21	47	61	NA
Avr2	PITG_21645	PHIF	OG0011846	114	Sig-RXLR-dEER	RLLR	21	47	61	NA
Avr2	PITG_21949	PHIF	OG0011846	114	Sig-RXLR-dEER	RLLR	21	47	61	NA
Avr2	PITG_23008	PHIF	OG0011846	114	Sig-RXLR-dEER	RLLR	21	47	61	NA
Avr2	PITG_23009	PHIF	OG0011846	114	Sig-RXLR-dEER	RLLR	21	47	61	NA
Avr2	PITG_08943	PHIF	OG0013552	116	Sig-RXLR-dEER	RLLR	20	49	63	NA
Avr2	PITG_08949	PHIF	OG0013552	99	Sig-RXLR-dEER	RLLR	20	49	63	NA
Avr2	PPTG_03253	PHPA	OG0013552	112	Sig-RXLR-dEER	RLLR	21	45	59	NA
Avr2	PPTG_18824	PHPA	OG0013552	118	Sig-RXLR-dEER	RLLR	21	51	65	NA
Avr2	PITG_12706	PHIF	OG0014333	118	Sig-RXLR	GRLR	19	71	NA	NA
Avr2	PITG_12710	PHIF	OG0014333	100	Sig-RXLR	GRLR	19	71	NA	NA
Avr2	PITG_15454	PHIF	OG0014333	118	Sig-RXLR	GRLR	19	71	NA	NA
Avr2	PITG_22972	PHIF	OG0014333	76	Sig-RXLR	RLLR	19	51	NA	NA
Avr2	PITG_05118	PHIF	OG0017390	104	Sig-RXLR-dEER	RSLR	21	50	63	NA
Avr2	PITG_05121	PHIF	OG0017390	114	Sig-RXLR	RSLR	21	50	NA	NA
Avr3a	PITG_14371	PHIF	OG0002901	147	Sig-RXLR-dEER-WY	RLLR	21	44	57	1	Ref
Avr3a	KAG2766215.1	PHCR	OG0000708	81	Sig-RXLR	RFLR	21	52	NA	NA
Avr3a	OWY90695.1	PHMG	OG0000708	138	Sig-RXLR-dEER-WY	RFLR	21	53	60	1
Avr3a	OWY91187.1	PHMG	OG0000708	151	Sig-RXLR-dEER-WY	RLLR	23	53	60	1
Avr3a	OWY96411.1	PHMG	OG0000708	138	Sig-RXLR-dEER-WY	RLLR	23	53	60	1
Avr3a	OWY96972.1	PHMG	OG0000708	138	Sig-RXLR-dEER-WY	RLLR	23	53	60	1
Avr3a	OWY97119.1	PHMG	OG0000708	138	Sig-RXLR-dEER-WY	RFLR	21	47	61	1
Avr3a	OWZ03527.1	PHMG	OG0000708	137	Sig-RXLR-dEER-WY	RLLR	22	52	59	1
Avr3a	OWZ04429.1	PHMG	OG0000708	138	Sig-RXLR-dEER-WY	RFLR	21	53	60	1
Avr3a	OWZ05463.1	PHMG	OG0000708	140	Sig-RXLR-dEER-WY	RLLR	20	50	64	1
Avr3a	OWZ07308.1	PHMG	OG0000708	140	Sig-RXLR-dEER-WY	RLLR	24	50	64	1
Avr3a	OWZ10820.1	PHMG	OG0000708	138	Sig-RXLR-dEER-WY	RFLR	21	53	60	1
Avr3a	OWZ11350.1	PHMG	OG0000708	70	Sig-hdRXLR	KVK	21	47	NA	NA
Avr3a	OWZ16389.1	PHMG	OG0000708	144	Sig-RXLR-dEER-WY	RFLR	21	54	68	1
Avr3a	OWZ20908.1	PHMG	OG0000708	120	Sig-dEER-WY	NA	23	NA	43	1
Avr3a	PHYCA_103340	PHCA	OG0000708	125	Sig-RXLR-dEER	RFLR	21	48	62	NA
Avr3a	PHYCA_113768	PHCA	OG0000708	134	Sig-RXLR-dEER-WY	RLLR	21	48	63	1
Avr3a	PHYCA_114012	PHCA	OG0000708	134	Sig-RXLR-dEER-WY	RFLR	21	48	63	1
Avr3a	PHYCA_114071	PHCA	OG0000708	129	Sig-RXLR-dEER-WY	RFLR	16	45	60	1
Avr3a	PHYCA_114125	PHCA	OG0000708	122	Sig-RXLR-dEER-WY	RLLR	21	45	56	1
Avr3a	PHYCA_114163	PHCA	OG0000708	132	Sig-RXLR-dEER-WY	RLLR	21	45	60	1
Avr3a	PHYCA_123335	PHCA	OG0000708	101	RXLR-dEER	RSLR	NA	22	36	NA
Avr3a	PHYCA_124187	PHCA	OG0000708	142	Sig-hdRXLR-WY	QVYN	29	130	NA	1
Avr3a	PHYCA_5186	PHCA	OG0000708	111	Sig-RXLR-dEER	RSLR	21	48	62	NA
Avr3a	PHYCA_8132	PHCA	OG0000708	132	Sig-RXLR-dEER-WY	RFLR	21	46	61	1
Avr3a	PHYKE_3920	PHKE	OG0000708	143	Sig-hdRXLR-WY	KFLN	21	116	NA	1
Avr3a	PHYKE_831	PHKE	OG0000708	127	Sig-RXLR-dEER-WY	RFLR	21	54	68	1
Avr3a	PHYSO_284582	PHSO	OG0000708	151	Sig-RXLR-dEER	RFLR	21	55	69	NA
Avr3a	PHYSO_286704	PHSO	OG0000708	139	Sig-RXLR-WY	RFLR	21	52	NA	1
Avr3a	PHYSO_286722	PHSO	OG0000708	139	Sig-RXLR	RFLR	21	52	NA	NA
Avr3a	PITG_05911	PHIF	OG0000708	135	Sig-RXLR-dEER-WY	RFLR	21	54	64	1
Avr3a	PITG_05912	PHIF	OG0000708	135	Sig-RXLR-dEER-WY	RFLR	21	54	64	1
Avr3a	PITG_05918	PHIF	OG0000708	135	Sig-RXLR-WY	RFLR	21	54	NA	1
Avr3a	PITG_13593	PHIF	OG0000708	141	Sig-hdRXLR-WY	KMK	24	110	NA	1
Avr3a	PITG_16282	PHIF	OG0000708	95	Sig-RXLR-dEER	RFLR	21	53	63	NA
Avr3a	PITG_22089	PHIF	OG0000708	135	Sig-RXLR-dEER-WY	RFLR	21	54	64	1
Avr3a	POM59916.1	PHPV	OG0000708	133	Sig-RXLR-dEER	RFLR	21	51	62	NA
Avr3a	POM67993.1	PHPV	OG0000708	145	Sig-RXLR-dEER-WY	RFLR	21	54	68	1
Avr3a	PPTG_20283	PHPA	OG0000708	75	Sig-hdRXLR	RMR	18	64	NA	NA
Avr3a	PPTG_24440	PHPA	OG0000708	131	Sig-hdRXLR-WY	KMK	22	104	NA	1
Avr3a	OWZ01354.1	PHMG	OG0002901	137	Sig-RXLR-dEER-WY	RLLR	21	44	57	1
Avr3a	OWZ02127.1	PHMG	OG0002901	66	WY	NA	NA	NA	NA	1
Avr3a	OWZ05205.1	PHMG	OG0002901	134	Sig-RXLR-dEER	RLLR	21	44	57	NA
Avr3a	OWZ09629.1	PHMG	OG0002901	160	Sig-RXLR-dEER-WY	RFLR	21	44	57	1
Avr3a	OWZ13110.1	PHMG	OG0002901	53	hdRXLR-WY	RLYN	NA	41	NA	1
Avr3a	OWZ19875.1	PHMG	OG0002901	65	Sig-RXLR	RLLR	17	44	NA	NA
Avr3a	PITG_14368	PHIF	OG0002901	148	Sig-RXLR-dEER-WY	RLLR	21	44	57	1
Avr3a	PITG_14374	PHIF	OG0002901	147	Sig-RXLR-dEER-WY	RFLR	21	44	57	1
Avr3a	PITG_23016	PHIF	OG0002901	77	Sig-RXLR	RWLR	21	74	NA	NA
Avr3a	POM60130.1	PHPV	OG0002901	138	Sig-RXLR-dEER-WY	RLLR	21	46	59	1
Avr3a	POM64653.1	PHPV	OG0002901	138	Sig-RXLR-dEER-WY	RLLR	21	46	59	1
Avr3a	POM68464.1	PHPV	OG0002901	138	Sig-RXLR-dEER-WY	RLLR	21	46	59	1
Avr3a	POM69409.1	PHPV	OG0002901	141	Sig-RXLR-dEER-WY	RLLR	21	46	59	1
Avr3a	PPTG_17264	PHPA	OG0002901	56	NA	NA	NA	NA	NA	NA
Avr3b	PITG_18215	PHIF	OG0002496	148	Sig-RXLR-dEER	RSLR	22	44	56	NA	Ref
Avr3b	OWY92509.1	PHMG	OG0002496	137	Sig-RXLR-dEER-WY	RSLR	22	41	52	1
Avr3b	OWY95345.1	PHMG	OG0002496	135	Sig-RXLR-dEER-WY	RFLR	22	41	52	1
Avr3b	OWZ02721.1	PHMG	OG0002496	152	Sig-RXLR-dEER-WY	RFLR	23	53	65	1
Avr3b	OWZ08572.1	PHMG	OG0002496	134	Sig-RXLR-dEER-WY	RFLR	20	41	52	1
Avr3b	OWZ10750.1	PHMG	OG0002496	136	Sig-RXLR-dEER-WY	RSLR	22	41	52	1
Avr3b	OWZ19884.1	PHMG	OG0002496	146	Sig-RXLR-dEER-WY	RFLR	20	47	58	1
Avr3b	OWZ24039.1	PHMG	OG0002496	141	Sig-hdRXLR-WY	KYK	20	116	NA	1
Avr3b	PHYSO_285647	PHSO	OG0002496	144	Sig-RXLR-dEER-WY	RFLR	20	44	59	1
Avr3b	PHYSO_292825	PHSO	OG0002496	144	Sig-RXLR-dEER-WY	RFLR	20	44	59	1
Avr3b	PITG_18221	PHIF	OG0002496	105	Sig-RXLR-dEER	RSLR	22	44	56	NA
Avr3b	POM57818.1	PHPV	OG0002496	488	Sig-RXLR-dEER-WY	RFLR	18	44	55	1
Avr3b	POM58314.1	PHPV	OG0002496	138	Sig-RXLR-dEER-WY	RFLR	18	44	55	1
Avr3b	PPTG_05910	PHPA	OG0002496	153	Sig-RXLR-dEER-WY	RFLR	17	46	60	1
Avr3b	PPTG_13713	PHPA	OG0002496	168	Sig-RXLR-dEER	RSLR	20	46	60	NA
Avr4	PITG_07387	PHIF	OG0012420	287	Sig-RXLR-dEER-WY	RFLR	24	42	49,53	2	Ref
Avr4	KAG2788683.1	PHCR	OG0003589	146	hdRXLR-WY	RMK	NA	58	NA	2
Avr4	KAG2788808.1	PHCR	OG0003589	88	hdRXLR-WY	KAYR	NA	65	NA	1
Avr4	KAG2789074.1	PHCR	OG0003589	121	RXLR-WY	RQLR	NA	99	NA	1
Avr4	OWZ07377.1	PHMG	OG0003589	137	hdRXLR-WY	KFR	NA	71	NA	2
Avr4	PHYSO_248631	PHSO	OG0003589	120	hdRXLR	RNYK	NA	89	NA	NA
Avr4	PHYSO_355066	PHSO	OG0003589	192	Sig-RXLR-dEER-WY	QALR	20	99	119	2
Avr4	PHYSO_445681	PHSO	OG0003589	138	RXLR-WY	RLLR	NA	2	NA	2
Avr4	PHYSO_511756	PHSO	OG0003589	173	RXLR-dEER-WY	RLLR	NA	3	12	1
Avr4	PITG_05910	PHIF	OG0003589	198	Sig-RXLR-WY	GVLR	20	60	NA	2
Avr4	PITG_07435	PHIF	OG0003589	166	Sig-RXLR-dEER-WY	RVLR	18	50	67	1
Avr4	PITG_22926	PHIF	OG0003589	198	Sig-RXLR-WY	GVLR	20	60	NA	2
Avr4	POM72576.1	PHPV	OG0003589	143	hdRXLR-WY	KTLK	NA	101	NA	2
Avr4	POM76405.1	PHPV	OG0003589	207	Sig-RXLR-WY	GFLR	22	69	NA	2
Avr4	PPTG_12652	PHPA	OG0003589	212	Sig-RXLR-dEER-WY	RFLR	20	50	67	2
Avr4	KAG2786343.1	PHCR	OG0012420	288	Sig-RXLR-dEER-WY	RSLR	22	42	59	2
Avr4	OWZ23895.1	PHMG	OG0012420	141	hdRXLR-WY	KLK	NA	90	NA	1
Avr4	POM61143.1	PHPV	OG0012420	156	Sig-RXLR-dEER	RFLR	20	47	64	NA
Avr4	POM64001.1	PHPV	OG0012420	303	Sig-RXLR-dEER-WY	RFLR	20	47	64	1
Avr4	PPTG_14063	PHPA	OG0012420	286	Sig-hdRXLR-WY	KALN	21	107	NA	3
Avr4	PPTG_16436	PHPA	OG0012420	289	Sig-RXLR-dEER	RFLR	19	42	59	NA
Avr8	PITG_07558	PHIF	OG0000121	244	Sig-RXLR-WY	RSLR	20	37	NA	2	Ref
Avr8	KAG2786055.1	PHCR	OG0000121	269	Sig-RXLR-WY	RSLR	20	50	NA	2
Avr8	KAG2787797.1	PHCR	OG0000121	258	Sig-RXLR-WY	RSLR	23	37	NA	1
Avr8	OWY94025.1	PHMG	OG0000121	214	Sig-RXLR-dEER-WY	RTLR	23	52	68	1
Avr8	OWZ08144.1	PHMG	OG0000121	261	Sig-RXLR-dEER-WY	RSLR	23	38	55	2
Avr8	OWZ08527.1	PHMG	OG0000121	264	Sig-RXLR-dEER-WY	RSLR	22	49	65	2
Avr8	OWZ12026.1	PHMG	OG0000121	253	Sig-hdRXLR-WY	GYR	19	120	NA	2
Avr8	OWZ14409.1	PHMG	OG0000121	231	RXLR-WY	RSLR	NA	17	NA	2
Avr8	OWZ19292.1	PHMG	OG0000121	273	Sig-RXLR-dEER-WY	RSLR	21	50	66	2
Avr8	OWZ19293.1	PHMG	OG0000121	273	Sig-RXLR-dEER-WY	RSLR	19	50	66	1
Avr8	OWZ21176.1	PHMG	OG0000121	200	RXLR-WY	GWLR	NA	62	NA	2
Avr8	PHYCA_133657	PHCA	OG0000121	214	RXLR-dEER-WY	RALR	NA	28	37	2
Avr8	PHYCA_538116	PHCA	OG0000121	150	Sig-RXLR-dEER-WY	RSLR	22	36	50	2
Avr8	PHYCA_97196	PHCA	OG0000121	253	Sig-RXLR-dEER-WY	RSLR	20	36	50	1
Avr8	PHYRA_77944	PHRA	OG0000121	302	RXLR-WY	RSLR	NA	91	NA	2
Avr8	PHYRA_77945	PHRA	OG0000121	265	Sig-RXLR-WY	RSLR	23	53	NA	2
Avr8	PHYRA_77948	PHRA	OG0000121	267	Sig-RXLR-dEER-WY	RSLR	23	53	63	2
Avr8	PHYRA_84127	PHRA	OG0000121	188	hdRXLR-WY	GYN	NA	94	NA	1
Avr8	PHYSO_286355	PHSO	OG0000121	291	Sig-RXLR-WY	RSLR	19	30	NA	2
Avr8	PHYSO_286369	PHSO	OG0000121	154	Sig-hdRXLR-WY	GYK	21	122	NA	1
Avr8	PHYSO_286372	PHSO	OG0000121	305	RXLR-dEER-WY	RSLR	NA	100	112	2
Avr8	PHYSO_288926	PHSO	OG0000121	249	Sig-RXLR-dEER-WY	RALR	24	50	69	3
Avr8	PHYSO_390023	PHSO	OG0000121	81	hdRXLR-WY	KYR	NA	75	NA	1
Avr8	PHYSO_513852	PHSO	OG0000121	175	hdRXLR-WY	RYVN	NA	89	NA	3
Avr8	PITG_07533	PHIF	OG0000121	259	Sig-RXLR-WY	RSLR	21	51	NA	2
Avr8	PITG_07556	PHIF	OG0000121	239	Sig-hdRXLR-WY	KAFR	20	115	NA	2
Avr8	PITG_07954	PHIF	OG0000121	266	Sig-RXLR-WY	RLLR	21	32	NA	2
Avr8	POM58761.1	PHPV	OG0000121	277	Sig-RXLR-dEER-WY	RSLR	15	47	63	3
Avr8	POM63697.1	PHPV	OG0000121	250	Sig-RXLR-dEER-WY	RLLR	20	37	53	3
Avr8	POM68126.1	PHPV	OG0000121	121	hdRXLR-WY	RFVK	NA	30	NA	2
Avr8	POM74104.1	PHPV	OG0000121	277	Sig-RXLR-dEER-WY	RSLR	15	47	63	3
Avr8	POM74542.1	PHPV	OG0000121	281	Sig-RXLR-dEER-WY	RSLR	17	47	63	1
Avr8	POM74916.1	PHPV	OG0000121	155	hdRXLR-WY	GYK	NA	91	NA	1
Avr8	POM76756.1	PHPV	OG0000121	279	Sig-RXLR-dEER-WY	RSLR	17	45	61	3
Avr8	PPTG_06201	PHPA	OG0000121	200	RXLR-WY	RSLR	NA	29	NA	1
Avr8	PPTG_08130	PHPA	OG0000121	97	hdRXLR-dEER-WY	KVYK	NA	79	89	1
Avr8	PPTG_08384	PHPA	OG0000121	118	hdRXLR-WY	KLK	NA	42	NA	1
Avr8	PPTG_08458	PHPA	OG0000121	250	hdRXLR-WY	KNYK	NA	71	NA	2
Avr8	PPTG_08692	PHPA	OG0000121	254	Sig-RXLR-WY	RSLR	20	37	NA	2
Avr8	PPTG_18711	PHPA	OG0000121	267	RXLR-dEER-WY	RSLR	NA	45	58	1
Avr8	PPTG_24523	PHPA	OG0000121	163	Sig-hdRXLR-WY	RMLK	23	112	NA	2
Avr8	OWY91300.1	PHMG	OG0000930	220	hdRXLR-WY	KEIK	NA	91	NA	1
Avr8	OWY92391.1	PHMG	OG0000930	72	Sig-RXLR-dEER	RLLR	21	51	70	NA
Avr8	OWY92780.1	PHMG	OG0000930	262	hdRXLR-WY	GDIN	NA	61	NA	2
Avr8	OWY93244.1	PHMG	OG0000930	159	hdRXLR	KVK	NA	78	NA	NA
Avr8	OWY93916.1	PHMG	OG0000930	335	Sig-RXLR-dEER-WY	RLLR	31	51	60,66	1
Avr8	OWY94574.1	PHMG	OG0000930	57	Sig-RXLR	RSLR	25	49	NA	NA
Avr8	OWY96513.1	PHMG	OG0000930	232	hdRXLR-dEER-WY	RTMK	NA	80	105	2
Avr8	OWY96666.1	PHMG	OG0000930	221	hdRXLR-WY	GFN	NA	94	NA	1
Avr8	OWY97285.1	PHMG	OG0000930	149	RXLR-WY	RSLR	NA	5	NA	2
Avr8	OWY98138.1	PHMG	OG0000930	356	Sig-RXLR-dEER	RSLR	24	54	71	NA
Avr8	OWY98368.1	PHMG	OG0000930	337	Sig-hdRXLR-WY	HFVK	18	110	NA	1
Avr8	OWY98451.1	PHMG	OG0000930	181	Sig-hdRXLR	KMK	20	113	NA	NA
Avr8	OWZ01218.1	PHMG	OG0000930	254	Sig-RXLR-dEER-WY	RSLR	29	54	69	2
Avr8	OWZ01355.1	PHMG	OG0000930	233	hdRXLR-WY	HVR	NA	78	NA	3
Avr8	OWZ02696.1	PHMG	OG0000930	299	RXLR-dEER-WY	RSLR	NA	10	25	1
Avr8	OWZ03517.1	PHMG	OG0000930	187	Sig-hdRXLR-WY	GNVN	27	120	NA	1
Avr8	OWZ04580.1	PHMG	OG0000930	294	hdRXLR	GNIN	NA	96	NA	NA
Avr8	OWZ05066.1	PHMG	OG0000930	480	hdRXLR-WY	KTYK	NA	96	NA	1
Avr8	OWZ05067.1	PHMG	OG0000930	154	Sig-RXLR-dEER-WY	RSLR	27	50	65	2
Avr8	OWZ05068.1	PHMG	OG0000930	219	hdRXLR-WY	GNVK	NA	73	NA	3
Avr8	OWZ05125.1	PHMG	OG0000930	236	hdRXLR-WY	KVN	NA	93	NA	1
Avr8	OWZ05464.1	PHMG	OG0000930	225	hdRXLR-WY	RTVK	NA	70	NA	3
Avr8	OWZ05465.1	PHMG	OG0000930	197	hdRXLR	RMVN	NA	49	NA	NA
Avr8	OWZ05604.1	PHMG	OG0000930	115	hdRXLR-WY	HTIR	NA	89	NA	2
Avr8	OWZ10733.1	PHMG	OG0000930	325	Sig-RXLR-WY	RFLR	29	51	NA	2
Avr8	OWZ16432.1	PHMG	OG0000930	121	hdRXLR	KVR	NA	91	NA	NA
Avr8	OWZ16919.1	PHMG	OG0000930	323	Sig-RXLR-dEER-WY	RSLR	27	32	73	2
Avr8	OWZ18212.1	PHMG	OG0000930	265	hdRXLR-WY	HLN	NA	101	NA	1
Avr8	OWZ19727.1	PHMG	OG0000930	93	Sig-RXLR-dEER	RALR	25	48	67	NA
Avr8	OWZ21357.1	PHMG	OG0000930	382	RXLR-dEER-WY	RILR	NA	10	25	1
Avr8	OWZ22241.1	PHMG	OG0000930	161	hdRXLR	RMLN	NA	49	NA	NA
Avr8	PHYSO_265365	PHSO	OG0001471	69	Sig-hdRXLR-WY	QVMK	19	58	NA	1
Avr8	KAG2784522.1	PHCR	OG0001905	126	hdRXLR	QYVK	NA	100	NA	NA
Avr8	KAG2784550.1	PHCR	OG0001905	282	Sig-RXLR-dEER-WY	RSLR	24	47	56,71	2
Avr8	KAG2784685.1	PHCR	OG0001905	282	Sig-RXLR-dEER-WY	RSLR	20	47	56,71	2
Avr8	OWZ08143.1	PHMG	OG0001905	132	hdRXLR-dEER	GLIR	NA	87	93	NA
Avr8	OWZ08314.1	PHMG	OG0001905	282	Sig-hdRXLR-WY	KLN	18	91	NA	2
Avr8	OWZ09168.1	PHMG	OG0001905	184	hdRXLR	RYVN	NA	83	NA	NA
Avr8	PHYCA_101354	PHCA	OG0001905	255	Sig-RXLR-dEER	RPLR	20	47	61	NA
Avr8	PHYCA_101579	PHCA	OG0001905	265	Sig-RXLR-dEER-WY	RSLR	20	46	67	1
Avr8	PITG_09586	PHIF	OG0001905	258	Sig-RXLR-dEER-WY	RTLR	18	35	56	1
Avr8	PITG_09616	PHIF	OG0001905	283	Sig-hdRXLR-WY	KNYN	24	123	NA	2
Avr8	PITG_09622	PHIF	OG0001905	278	Sig-RXLR-dEER-WY	RSLR	20	47	56,71	1
Avr8	PITG_09647	PHIF	OG0001905	277	Sig-RXLR-dEER-WY	RILR	26	46	67	1
Avr8	PITG_09660	PHIF	OG0001905	283	Sig-hdRXLR-WY	KNYN	24	123	NA	1
Avr8	POM59259.1	PHPV	OG0001905	91	Sig-RXLR-dEER	RSLR	19	37	58	NA
Avr8	POM60124.1	PHPV	OG0001905	250	RXLR-dEER-WY	RSLR	NA	16	37	2
Avr8	POM71806.1	PHPV	OG0001905	276	Sig-RXLR-dEER-WY	RSLR	20	47	71	1
Avr8	PPTG_01719	PHPA	OG0001905	145	hdRXLR	HMIN	NA	65	NA	NA
Avr8	PPTG_01733	PHPA	OG0001905	313	Sig-RXLR-dEER-WY	RSLR	20	44	66	3
Avr8	PPTG_06689	PHPA	OG0001905	251	Sig-RXLR-dEER-WY	RSLR	18	44	57	1
Avr8	KAG2785195.1	PHCR	OG0011053	51	hdRXLR	KLYK	NA	26	NA	NA
Avr8	OWY99497.1	PHMG	OG0011053	180	hdRXLR	KYK	NA	73	NA	NA
Avr8	OWZ04114.1	PHMG	OG0011053	156	hdRXLR	GEFK	NA	89	NA	NA
Avr8	OWZ05940.1	PHMG	OG0011053	282	Sig-RXLR-dEER	RSLR	23	49	73	NA
Avr8	OWZ06388.1	PHMG	OG0011053	282	Sig-RXLR-dEER	RSLR	27	46	67	NA
Avr8	OWZ07504.1	PHMG	OG0011053	170	hdRXLR	GEYK	NA	90	NA	NA
Avr8	OWZ08190.1	PHMG	OG0011053	284	Sig-RXLR-dEER	RSLR	23	48	72	NA
Avr8	OWZ09838.1	PHMG	OG0011053	164	Sig-RXLR-dEER	RSLR	23	49	73	NA
Avr8	OWZ20139.1	PHMG	OG0011053	285	Sig-RXLR-dEER	RSLR	20	51	75	NA
Avr8	OWZ24095.1	PHMG	OG0014539	81	hdRXLR-WY	QVK	NA	78	NA	1
Avr8	PHYSO_288662	PHSO	OG0015861	95	Sig-RXLR-WY	RSLR	24	50	NA	1
Avr8	PHYSO_288665	PHSO	OG0015861	95	Sig-RXLR-WY	RSLR	24	50	NA	1
Avr8	PHYSO_353461	PHSO	OG0015861	306	Sig-RXLR-WY	RSLR	21	51	NA	3
Avr8	PHYSO_286519	PHSO	OG0018730	233	Sig-RXLR-dEER-WY	RSLR	23	32	45	1
Avr8	PHYSO_286521	PHSO	OG0018730	249	Sig-RXLR-dEER-WY	RSLR	18	43	57	1
Avr10	PITG_11484	PHIF	OG0013549	135	Sig-RXLR-dEER	RSLR	19	44	61	NA	Ref
Avr10	KAG2771921.1	PHCR	OG0000296	142	Sig-RXLR-dEER	RSLR	21	50	58,70	NA
Avr10	KAG2771923.1	PHCR	OG0000296	142	Sig-RXLR-dEER	RSLR	21	50	58,70	NA
Avr10	OWY92465.1	PHMG	OG0000296	145	Sig-RXLR-dEER	RSLR	19	50	60,69	NA
Avr10	OWY94407.1	PHMG	OG0000296	185	hdRXLR	RCVN	NA	85	NA	NA
Avr10	OWY97030.1	PHMG	OG0000296	117	Sig-RXLR-dEER	RFLR	22	56	66	NA
Avr10	OWY97468.1	PHMG	OG0000296	136	Sig-RXLR-dEER	RSLR	20	50	71	NA
Avr10	OWY97501.1	PHMG	OG0000296	145	Sig-hdRXLR	KEYN	18	113	NA	NA
Avr10	OWY98169.1	PHMG	OG0000296	139	Sig-RXLR-dEER	RFLR	19	55	65	NA
Avr10	OWY99080.1	PHMG	OG0000296	143	Sig-RXLR-dEER	RSLR	19	50	67	NA
Avr10	OWZ01421.1	PHMG	OG0000296	153	Sig-RXLR-dEER	RSLR	17	50	76	NA
Avr10	OWZ01846.1	PHMG	OG0000296	113	RXLR-dEER-WY	RSLR	NA	18	28,37	1
Avr10	OWZ02945.1	PHMG	OG0000296	141	Sig-RXLR-dEER	RTLR	21	49	60,67	NA
Avr10	OWZ04459.1	PHMG	OG0000296	121	RXLR	GALR	NA	63	NA	NA
Avr10	OWZ05115.1	PHMG	OG0000296	129	Sig-RXLR	GKLR	21	113	NA	NA
Avr10	OWZ06550.1	PHMG	OG0000296	146	Sig-hdRXLR-WY	KWVK	17	106	NA	1
Avr10	OWZ07888.1	PHMG	OG0000296	141	Sig-RXLR-dEER	RTLR	21	49	59,67	NA
Avr10	OWZ07891.1	PHMG	OG0000296	129	Sig-RXLR	GPLR	22	113	NA	NA
Avr10	OWZ08479.1	PHMG	OG0000296	102	Sig-RXLR	GKLR	19	94	NA	NA
Avr10	OWZ08607.1	PHMG	OG0000296	121	Sig-RXLR	GKLR	22	113	NA	NA
Avr10	OWZ10189.1	PHMG	OG0000296	129	Sig-hdRXLR	QYR	28	123	NA	NA
Avr10	OWZ11435.1	PHMG	OG0000296	145	Sig-RXLR-dEER	RSLR	19	50	60,69	NA
Avr10	OWZ12560.1	PHMG	OG0000296	141	Sig-RXLR-dEER	GTLR	21	49	60,67	NA
Avr10	OWZ12561.1	PHMG	OG0000296	131	Sig-RXLR	GELR	19	111	NA	NA
Avr10	OWZ14112.1	PHMG	OG0000296	101	RXLR-dEER	RTLR	NA	9	27	NA
Avr10	OWZ14127.1	PHMG	OG0000296	129	Sig-RXLR	GKLR	22	113	NA	NA
Avr10	OWZ15310.1	PHMG	OG0000296	143	Sig-RXLR-dEER	RLLR	22	49	62,66	NA
Avr10	OWZ15446.1	PHMG	OG0000296	128	Sig-RXLR-dEER	RFLR	23	42	59	NA
Avr10	OWZ16446.1	PHMG	OG0000296	129	Sig-RXLR	GKLR	22	113	NA	NA
Avr10	OWZ21885.1	PHMG	OG0000296	147	Sig-RXLR-dEER	RFLR	22	54	71	NA
Avr10	PHYCA_13935	PHCA	OG0000296	140	RXLR-dEER	RSLR	NA	55	80	NA
Avr10	PHYCA_13936	PHCA	OG0000296	141	Sig-RXLR-dEER	RSLR	17	54	79	NA
Avr10	PHYCA_13937	PHCA	OG0000296	146	Sig-RXLR-dEER	RSLR	17	54	79	NA
Avr10	PHYCA_13944	PHCA	OG0000296	108	RXLR-dEER	RSLR	NA	24	46	NA
Avr10	PHYCA_13953	PHCA	OG0000296	136	Sig-RXLR-dEER	RSLR	19	51	74	NA
Avr10	PHYRA_77765	PHRA	OG0000296	142	Sig-RXLR-dEER-WY	RFLR	21	54	75	1
Avr10	PITG_13453	PHIF	OG0000296	143	Sig-hdRXLR	RIK	21	74	NA	NA
Avr10	PITG_14732	PHIF	OG0000296	139	Sig-RXLR-dEER	RRLR	26	52	68	NA
Avr10	PITG_14736	PHIF	OG0000296	142	Sig-RXLR-dEER	RLLR	26	52	68	NA
Avr10	PITG_14737	PHIF	OG0000296	142	Sig-RXLR-dEER	RLLR	26	52	68	NA
Avr10	PITG_14738	PHIF	OG0000296	142	Sig-RXLR-dEER	RLLR	26	52	68	NA
Avr10	PITG_14739	PHIF	OG0000296	142	Sig-RXLR-dEER	RLLR	26	52	68	NA
Avr10	PITG_17838	PHIF	OG0000296	142	Sig-RXLR-dEER	RLLR	26	52	68	NA
Avr10	PITG_18224	PHIF	OG0000296	130	Sig-hdRXLR	KLYR	22	118	NA	NA
Avr10	PITG_18227	PHIF	OG0000296	136	hdRXLR	QMR	NA	39	NA	NA
Avr10	POM57620.1	PHPV	OG0000296	102	Sig-RXLR-dEER	RFLR	24	56	67,73	NA
Avr10	POM59223.1	PHPV	OG0000296	152	Sig-RXLR-dEER	RFLR	24	56	75	NA
Avr10	POM59345.1	PHPV	OG0000296	146	Sig-RXLR-dEER	RSLR	21	51	59,73	NA
Avr10	POM60195.1	PHPV	OG0000296	160	Sig-RXLR-dEER	RSLR	21	51	59,74,81	NA
Avr10	POM61000.1	PHPV	OG0000296	142	Sig-RXLR-dEER	RSLR	19	51	73	NA
Avr10	POM62875.1	PHPV	OG0000296	152	Sig-RXLR-dEER	RFLR	22	56	75	NA
Avr10	POM63257.1	PHPV	OG0000296	152	Sig-RXLR-dEER	RFLR	27	56	75	NA
Avr10	POM63443.1	PHPV	OG0000296	150	Sig-RXLR-dEER	RSLR	24	51	73	NA
Avr10	POM65902.1	PHPV	OG0000296	161	Sig-RXLR-dEER	RLLR	21	51	59,73,81	NA
Avr10	POM67709.1	PHPV	OG0000296	104	RXLR-dEER-WY	RSLR	NA	18	40	1
Avr10	POM69115.1	PHPV	OG0000296	140	Sig-RXLR	RSLR	19	48	NA	NA
Avr10	POM70244.1	PHPV	OG0000296	116	RXLR-dEER	RSLR	NA	18	39	NA
Avr10	POM71385.1	PHPV	OG0000296	147	Sig-RXLR-dEER	RSLR	21	51	74	NA
Avr10	POM71533.1	PHPV	OG0000296	161	Sig-RXLR-dEER	RLLR	21	51	59,74,81	NA
Avr10	POM72767.1	PHPV	OG0000296	156	Sig-RXLR-dEER	RFLR	24	56	73,79	NA
Avr10	POM73746.1	PHPV	OG0000296	149	Sig-RXLR-dEER	RSLR	21	51	59,62,73	NA
Avr10	POM74553.1	PHPV	OG0000296	66	RXLR-dEER	RSLR	NA	18	40	NA
Avr10	POM78703.1	PHPV	OG0000296	273	Sig-RXLR	QKLR	24	123	NA	NA
Avr10	POM79434.1	PHPV	OG0000296	137	Sig-RXLR-dEER	RSLR	18	51	73	NA
Avr10	POM81240.1	PHPV	OG0000296	76	RXLR-dEER	RFLR	NA	21	40	NA
Avr10	POM81529.1	PHPV	OG0000296	61	hdRXLR	QIYR	NA	47	NA	NA
Avr10	PPTG_11551	PHPA	OG0000296	129	Sig-RXLR-dEER	RLLR	23	52	74	NA
Avr10	PPTG_11561	PHPA	OG0000296	94	RXLR-dEER	RFLR	NA	17	39	NA
Avr10	PPTG_22954	PHPA	OG0000296	33	hdRXLR-WY	RFK	NA	3	NA	1
Avr10	PITG_11507	PHIF	OG0013549	96	Sig-RXLR	RSLR	19	44	NA	NA
Avr10	PPTG_07215	PHPA	OG0013549	108	RXLR-dEER	RMLR	NA	17	34	NA
Avr10	PPTG_07218	PHPA	OG0013549	143	Sig-RXLR-dEER	RMLR	23	52	69	NA
Avr10	PPTG_17039	PHPA	OG0013549	91	hdRXLR	HYK	NA	86	NA	NA
Avramr1	PITG_07569	PHIF	OG0001021	287	Sig-RXLR-dEER-WY	RYLR	21	53	61	2	Ref
Avramr1	HYAP_00664	HYAP	OG0001021	291	Sig-hdRXLR-WY	RVYN	19	118	NA	1
Avramr1	KAG2780357.1	PHCR	OG0001021	290	Sig-RXLR-dEER-WY	RFLR	21	56	64	2
Avramr1	OWY91542.1	PHMG	OG0001021	141	hdRXLR-WY	KLYK	NA	92	NA	2
Avramr1	OWY94373.1	PHMG	OG0001021	129	Sig-RXLR-dEER-WY	RFLR	19	58	69	1
Avramr1	OWY97055.1	PHMG	OG0001021	294	Sig-RXLR-dEER-WY	RFLR	21	55	64	1
Avramr1	OWZ00261.1	PHMG	OG0001021	291	Sig-hdRXLR-WY	KFK	19	115	NA	2
Avramr1	OWZ03422.1	PHMG	OG0001021	104	hdRXLR	HFK	NA	66	NA	NA
Avramr1	OWZ03424.1	PHMG	OG0001021	148	Sig-RXLR-dEER-WY	RFLR	21	55	64	1
Avramr1	OWZ03537.1	PHMG	OG0001021	226	hdRXLR	KFK	NA	73	NA	NA
Avramr1	OWZ18066.1	PHMG	OG0001021	297	Sig-RXLR-dEER-WY	RFLR	17	55	65	2
Avramr1	OWZ19244.1	PHMG	OG0001021	229	hdRXLR-WY	HPLN	NA	65	NA	3
Avramr1	PHYCA_10713	PHCA	OG0001021	289	Sig-RXLR-dEER-WY	RFLR	20	49	59	1
Avramr1	PHYRA_78748	PHRA	OG0001021	294	Sig-RXLR-dEER-WY	RFLR	19	52	67	3
Avramr1	PHYRA_81822	PHRA	OG0001021	294	Sig-RXLR-dEER-WY	RFLR	19	52	67	3
Avramr1	PHYRA_81823	PHRA	OG0001021	660	Sig-RXLR-dEER-WY	RFLR	19	52	67	3
Avramr1	PHYRA_81825	PHRA	OG0001021	295	Sig-RXLR-dEER-WY	RFLR	19	52	67	3
Avramr1	PHYSO_286958	PHSO	OG0001021	294	Sig-RXLR-dEER-WY	RFLR	17	57	70	2
Avramr1	PHYSO_304003	PHSO	OG0001021	116	Sig-WY	NA	21	NA	NA	1
Avramr1	PHYSO_336774	PHSO	OG0001021	304	Sig-hdRXLR-WY	RLN	23	121	NA	2
Avramr1	PITG_07566	PHIF	OG0001021	217	Sig-RXLR-dEER-WY	RYLR	18	53	61	2
Avramr1	POM58479.1	PHPV	OG0001021	243	Sig-RXLR-dEER-WY	RFLR	21	55	66	2
Avramr1	POM61164.1	PHPV	OG0001021	294	Sig-RXLR-dEER-WY	RFLR	21	55	66	3
Avramr1	POM64211.1	PHPV	OG0001021	78	Sig-RXLR-dEER	RFLR	21	55	66	NA
Avramr1	POM64456.1	PHPV	OG0001021	289	Sig-hdRXLR-WY	KLR	21	110	NA	3
Avramr1	POM64779.1	PHPV	OG0001021	294	Sig-RXLR-dEER-WY	RFLR	21	55	66	3
Avramr1	POM70979.1	PHPV	OG0001021	294	Sig-RXLR-dEER-WY	RFLR	21	55	66	3
Avramr1	PPTG_08943	PHPA	OG0001021	221	hdRXLR-WY	HSLK	NA	63	NA	2
Avramr1	PPTG_20714	PHPA	OG0001021	262	RXLR-dEER-WY	RFLR	NA	41	50	1
Avramr3	PITG_21190	PHIF	OG0000121	339	Sig-RXLR-dEER-WY	RSLR	22	38	49	3	Ref
Avramr3	HYAP_13299	HYAP	OG0000121	295	Sig-hdRXLR-WY	KNYK	20	102	NA	3
Avramr3	KAG2761177.1	PHCR	OG0000121	341	Sig-RXLR-dEER-WY	RSLR	19	38	49	5
Avramr3	OWZ07700.1	PHMG	OG0000121	228	Sig-RXLR-dEER-WY	RSLR	22	34	45	2
Avramr3	OWZ14468.1	PHMG	OG0000121	290	hdRXLR-dEER-WY	GFK	NA	91	103	4
Avramr3	PHYRA_86187	PHRA	OG0000121	339	Sig-RXLR-dEER-WY	RSLR	18	53	64	2
Avramr3	PHYSO_286275	PHSO	OG0000121	246	Sig-WY	NA	26	NA	NA	3
Avramr3	POM69181.1	PHPV	OG0000121	341	Sig-RXLR-dEER-WY	RLLR	20	37	48	5
Avramr3	PPTG_00388	PHPA	OG0000121	337	Sig-RXLR-dEER-WY	RSLR	22	34	45	4
Avrblb1	PITG_21388	PHIF	OG0011825	152	Sig-RXLR-WY	RSLR	24	122	NA	1	Ref
Avrblb1	KAG2772356.1	PHCR	OG0002888	137	Sig-RXLR-dEER	RSLR	18	54	73	NA
Avrblb1	KAG2783076.1	PHCR	OG0002888	129	RXLR-dEER-WY	RILR	NA	43	62	1
Avrblb1	OWZ05619.1	PHMG	OG0002888	144	Sig-hdRXLR	KIIN	21	122	NA	NA
Avrblb1	OWZ13571.1	PHMG	OG0002888	150	Sig-RXLR-dEER-WY	RRLR	22	56	62,72	1
Avrblb1	PHYSO_285868	PHSO	OG0002888	197	RXLR-dEER	RSLR	NA	99	109	NA
Avrblb1	PHYSO_286098	PHSO	OG0002888	150	Sig-RXLR-dEER	RKLR	21	53	69	NA
Avrblb1	PHYSO_317825	PHSO	OG0002888	173	Sig-RXLR	RHLR	19	50	NA	NA
Avrblb1	PITG_04196	PHIF	OG0002888	140	Sig-RXLR-dEER-WY	RSLR	24	56	70	1
Avrblb1	PITG_04326	PHIF	OG0002888	135	Sig-hdRXLR	GDFR	21	111	NA	NA
Avrblb1	PITG_04329	PHIF	OG0002888	103	Sig-hdRXLR	RMFK	21	83	NA	NA
Avrblb1	PITG_12010	PHIF	OG0002888	83	Sig-RXLR-dEER	RSLR	21	57	73	NA
Avrblb1	PITG_16285	PHIF	OG0002888	137	Sig-RXLR-dEER-WY	RSLR	21	53	69	1
Avrblb1	PPTG_06356	PHPA	OG0002888	118	RXLR-dEER-WY	RSLR	NA	13	32	1
Avrblb1	PPTG_07462	PHPA	OG0002888	146	Sig-RXLR-dEER	RSLR	19	56	75	NA
Avrblb1	PPTG_07609	PHPA	OG0002888	146	Sig-hdRXLR	GDYK	18	118	NA	NA
Avrblb1	KAG2787699.1	PHCR	OG0011825	42	Sig	NA	21	NA	NA	NA
Avrblb1	KAG2787712.1	PHCR	OG0011825	163	Sig-RXLR-dEER	RRLR	21	57	76	NA
Avrblb1	PPTG_04415	PHPA	OG0011825	162	Sig-RXLR-dEER	RNLR	21	57	76	NA
Avrblb1	PPTG_04451	PHPA	OG0011825	156	Sig-RXLR-dEER	RRLR	21	56	75	NA
Avrblb1	PPTG_04541	PHPA	OG0011825	164	Sig-RXLR-dEER	RSLR	21	52	71	NA
Avrblb1	PPTG_04550	PHPA	OG0011825	161	Sig-RXLR-dEER	RNLR	21	57	76	NA
Avrblb1	PPTG_17218	PHPA	OG0011825	89	RXLR-dEER	RGLR	NA	26	45	NA
Avrblb1	PITG_08903	PHIF	OG0017332	167	Sig-RXLR-dEER	RSLR	21	57	76	NA
Avrblb1	PITG_18908	PHIF	OG0017332	167	Sig-RXLR-dEER	RSLR	21	57	76	NA
Avrblb1	PITG_11429	PHIF	OG0024846	153	Sig-RXLR-dEER	RSLR	21	56	75	NA
Avrblb2	PITG_04085	PHIF	OG0001008	100	Sig-RXLR	RSLR	22	43	NA	NA	Ref
Avrblb2	PITG_04086	PHIF	OG0001008	100	Sig-RXLR	RSLR	22	43	NA	NA	Ref
Avrblb2	PITG_04090	PHIF	OG0001008	100	Sig-RXLR	RSLR	22	43	NA	NA	Ref
Avrblb2	PITG_18683	PHIF	OG0001008	100	Sig-RXLR	RSLR	22	43	NA	NA	Ref
Avrblb2	PITG_20300	PHIF	OG0001008	100	Sig-RXLR	RSLR	22	43	NA	NA	Ref
Avrblb2	PITG_20301	PHIF	OG0001008	100	Sig-RXLR	RSLR	22	43	NA	NA	Ref
Avrblb2	PITG_20303	PHIF	OG0001008	100	Sig-RXLR	RSLR	22	43	NA	NA	Ref
Avrblb2	KAG2776415.1	PHCR	OG0001008	104	Sig-RXLR	RSLR	22	45	NA	NA
Avrblb2	PHYSO_385954	PHSO	OG0001008	88	RXLR	RSLR	NA	35	NA	NA
Avrblb2	PHYSO_388647	PHSO	OG0001008	88	RXLR	RSLR	NA	35	NA	NA
Avrblb2	PHYSO_458696	PHSO	OG0001008	50	NA	NA	NA	NA	NA	NA
Avrblb2	PHYSO_463680	PHSO	OG0001008	88	RXLR	RSLR	NA	35	NA	NA
Avrblb2	PHYSO_466239	PHSO	OG0001008	88	RXLR	RSLR	NA	35	NA	NA
Avrblb2	PHYSO_529641	PHSO	OG0001008	97	Sig-RXLR	RSLR	21	43	NA	NA
Avrblb2	PHYSO_530874	PHSO	OG0001008	97	Sig-RXLR	RSLR	21	43	NA	NA
Avrblb2	PHYSO_536084	PHSO	OG0001008	97	Sig-RXLR	RSLR	21	43	NA	NA
Avrblb2	PITG_04097	PHIF	OG0001008	107	Sig-RXLR	RSLR	22	40	NA	NA
Avrblb2	PITG_04194	PHIF	OG0001008	107	Sig-RXLR	RFLR	22	40	NA	NA
Avrblb2	PITG_18675	PHIF	OG0001008	107	Sig-RXLR	RLLR	22	40	NA	NA
Avrblb2	PITG_20857	PHIF	OG0001008	131	Sig-RXLR	RFLR	22	45	NA	NA
Avrblb2	PITG_22727	PHIF	OG0001008	70	Sig-RXLR	RYLR	22	43	NA	NA
Avrblb2	PITG_23193	PHIF	OG0001008	108	Sig-RXLR	RSLR	22	45	NA	NA
Avrblb2	PPTG_04478	PHPA	OG0001008	101	Sig-RXLR	RFLR	22	41	NA	NA
Avrblb2	PPTG_12790	PHPA	OG0001008	110	Sig-RXLR	RSLR	20	45	NA	NA
Avrblb2	PPTG_12798	PHPA	OG0001008	107	Sig-RXLR	RSLR	20	45	NA	NA
Avrblb2	PPTG_13751	PHPA	OG0001008	104	Sig-RXLR	RSLR	21	45	NA	NA
Avrblb2	PPTG_13757	PHPA	OG0001008	110	Sig-RXLR	RSLR	20	45	NA	NA
Avrblb2	PPTG_18954	PHPA	OG0001008	108	Sig-RXLR	RSLR	22	45	NA	NA
Avrblb2	PPTG_20019	PHPA	OG0001008	107	Sig-RXLR	RSLR	20	45	NA	NA
Avrblb2	PPTG_20340	PHPA	OG0001008	101	Sig-RXLR	RFLR	22	41	NA	NA
Avrblb2	PITG_04081	PHIF	OG0010086	105	Sig-RXLR	RSLR	21	39	NA	NA
Avrblb2	PITG_04089	PHIF	OG0010086	102	Sig-RXLR	RSLR	21	39	NA	NA
Avrblb2	PITG_18670	PHIF	OG0010086	105	Sig-RXLR	RSLR	21	39	NA	NA
Avrblb2	PITG_18685	PHIF	OG0010086	105	Sig-RXLR	RSLR	21	39	NA	NA
Avrblb2	PITG_22604	PHIF	OG0010086	105	Sig-RXLR	RSLR	21	39	NA	NA
Avrblb2	PITG_22648	PHIF	OG0010086	67	Sig-RXLR	RSLR	21	39	NA	NA
Avrblb2	PITG_22725	PHIF	OG0010086	90	Sig-RXLR	RSLR	19	41	NA	NA
Avrblb2	PITG_23135	PHIF	OG0010086	90	Sig-RXLR	RSLR	19	41	NA	NA
Avrblb2	PITG_23138	PHIF	OG0010086	84	Sig-RXLR	RSLR	19	39	NA	NA
Avrblb2	PITG_23185	PHIF	OG0010086	97	Sig-RXLR	RSLR	19	39	NA	NA
Avrblb2	PITG_09632	PHIF	OG0024934	106	Sig-RXLR	RSLR	22	44	NA	NA
Avrvnt1	PITG_16294	PHIF	OG0008733	153	Sig-RXLR-dEER	RLLR	23	47	60	NA	Ref
Avrvnt1	KAG2783509.1	PHCR	OG0008733	150	Sig-RXLR-dEER	RFLR	23	50	63	NA
Avrvnt1	OWZ21813.1	PHMG	OG0008733	133	Sig-RXLR-dEER	RLLR	20	48	60	NA
Avrvnt1	OWZ21820.1	PHMG	OG0008733	152	Sig-RXLR-dEER	RYLR	19	48	64	NA
Avrvnt1	PHYRA_74348	PHRA	OG0008733	155	Sig-RXLR-dEER	RYLR	20	48	64	NA
Avrvnt1	PHYSO_288816	PHSO	OG0008733	145	Sig-RXLR-dEER	RFLR	23	49	65	NA
Avrvnt1	PHYSO_306271	PHSO	OG0008733	123	RXLR-dEER-WY	RFLR	NA	25	41	1
Avrvnt1	PITG_18880	PHIF	OG0008733	154	Sig-RXLR-dEER	RFLR	23	48	61	NA
Avrvnt1	PITG_22547	PHIF	OG0008733	141	Sig-RXLR-dEER	RLLR	23	47	60	NA
Avrvnt1	PPTG_07192	PHPA	OG0008733	145	Sig-RXLR-dEER	RSLR	23	50	63	NA
Avrvnt1	PPTG_09765	PHPA	OG0008733	151	Sig-RXLR-dEER	RFLR	19	49	62	NA

## Sheet: Table 4
	Supplementary Table 4. Phytophthora strains used in the study
	Species	Strain number	Host plant species	Referencea
	Phytophthora infestans	T30-4	Potato	(Haas et al., Nature 2009)
	Phytophthora parasitica	40164	Potato	KACC
	Phytophthora parasitica	40402	Egg plant	KACC
	Phytophthora parasitica	40906	Tobacco	KACC
	Phytophthora cactorum	40166	Apple tree	KACC
	Phytophthora cactorum	40183	Strawberry	KACC
	Phytophthora palmivora	40409	Cymbidium	KACC
	Phytophthora palmivora	40410	Fig tree	KACC
	Phytophthora capsici	40464	Chili pepper	KACC
	Phytophthora sojae	40412	Soy bean	KACC
	Phytophthora sojae	40468	Soy bean	KACC
	Phytophthora sojae	48989	Soy bean	KACC
	a) KACC: Korean Agricultural Culture Collection, https://genebank.rda.go.kr/eng/uat/uia/actionMain.do

## Sheet: Table 5
Supplementary Table 5. Solanum NLRs used for the functional validations
	Gene	Promoter	Reference*	Solanum species
	R1	Native promoter	35	S. demissum
	R2	Native promoter	36	S. demissum
	R3a	Native promoter	37	S. demissum
	R8	Native promoter	38	S. demissum
	Rpi-amr1	p35s	39	S. americanum
	Rpi-blb1	p35s	40	S. bulbocastanum
	Rpi-blb2	Native promoter	41	S. bulbocastanum
	Rpi-vnt1	p35s	42	S. venturii
				*reference in manuscript

## Sheet: Table 6
Supplementary Table 6. Cloned effector homologs of Phytophthora spp.
List_No	BLASTP matched	Working name	Phylogroup	Cloned_AA	HR test*	Note
1	PITG_16663	PiAvr1	Avr1	MVSKLPSFIESFVKNRKIESWIQNKVTDDFVLSELKLVRLPGTSLADDPNFKLFQKFKIGGWLEEKATTTKAWENLGLDSLPFDQVSKIDEFKTYTQYVTVLNKKASKLDIDQWHGLLSGGSPEELMAKAMILRTLGRDVLERRVMLGGHVVVPF	O
2	PHYCA_113929	PcAvr1a	Avr1	MGGFTTYVKDSLTKWRINSKIKSWVKNKKTDEYVLKKLGLSTLTGKDLVNAPKYSQFQDFKVGMWLKEATPTTTVFNTLGLNKVEGAVENADDFGTYVKYVITLGEKADNYPLSQWPRLFGGGSLEQLELKRKILRLQKRNVLEINFMLG	O
3	PHYCA_567591	PcAvr1b_1	Avr1	MGGFTSYLMDSFTKWRINSKINSWVNKQKTDEYVLAKLGLSTLTGKELVKAAKYPQFQDFKVGVWLKEATPTTSVFSTLGLDKVEGAVEKADDFGTYVKYVMALGEKADDYPITRWRELFGGGSPEQLKLKRQLLFLARRDEFDIRIMLG	O
4	PHYCA_567591	PcAvr1b_2	Avr1	MGGFPSYLMDSFTKWRINSKINSWVNKQKTDEYVLAKLGLSTLTGKELVKAAKYPQFQDFKVGVWLKEATPTTSVFSTLGLDKVEGAVEKADDFGTYVKYVMALGEKADDYPITRWRELFGGGSPEQLKLKRQLLFLARRDEFDIRIMLG	O
5	PHYCA_129759	PcAvr1c	Avr1	MGGFPSYLKDSFTKWRINSKIKSWVKKQKTDEYVLSKLGLSTLTGKDLVNAPKYSQFQDFKVGMWLKEATPTTTVFNTLGLNKVEGAVEKADDFGTYVKYVMALGEKADNYPLVTWRKLFGGGSLEQLELKRKLLLLVKRDEIDISVMLG	O
6	PPTG_12206	PpAvr1a	Avr1	MGVLIPGLKNWRVTSWIKNGKSDDYVMDKLKLTGLIGRALTEDPNFKYFQKFKVDGWLKKGASTTTAWDDLGLNSIALGEVTKVDTFRIYQQYITELNKKAENIPWDRWSNLFGGGSETELAIKVSILAKLGRTDSIDLQLMVESRGMIAFLKAVKKHGKILDERVEMDVVKAIVNLQ	-
7	PPTG_20226	PpAvr1b	Avr1	MGVLIPGLKNWRVTSWIKNGKSEDYVLNKLHLTNLIGRALTDDPNFKYFQKFKVDGWLKQKASTTAAWDDLGLSTLSVNEITKVDTFRIYEEYIKALNKKAKDIHWSQWSKLLGGGSDTEMAIKVSILTKLGRLDDTDIALMVGSSGLIAYNRAARQYGKFY	-
8	KAG2773429.1	PcacAvr1a	Avr1	MGQLMPSFIKSRLTNWRINSWIQNNRPDDYVLRKLKLTGLAEKTLTENPNYKIFQKFKVNGWLKERATTTKAWGDLGLTRFSMYDVHKADGFNTYTHYVIALFKKAKKADSEEWSRLLRERSVTELVTKTMILRGFARDDQRLRSMLGI-	O
9	KAG2771952.1	PcacAvr1b	Avr1	MSLPVPSFIKSRVTNWRINSWIKNRYSDDYVLVNLRLTGLAGKTLTKHTNFKIFQKFKIDGWLKESATTTKAWDHLGLKGLNVAQLKRLTGAVLMCGM-	-
10	POM66420.1	PpalAvr1a	Avr1	MGLQSFISSLLSTRQINSWIKAGKTDDFVMNTLGLTGLTGEKLKNNPNFKKFQEFQVGRWLKENTPTSSVLENLKLNELDYAALITADGYNTYVKYVFDLGKRANKYNIEDWPTLFGTGTIEQLKHRAGLLRWMNNEDLDMFMASTIRSQQVL	O
11	POM58004.1	PpalAvr1b	Avr1	MGLLSFLPSNWQIKFWIKTGKTDDFVMNTLGIAGLTGEKLKNNPNFKKFQQFQVGRWLKEKTPTSLVLEKLKLNELDYAALIKADGYNTYVNYVFDLGKRANQYDIEDWPKLFGTGTIEQLQHRAGLLRWVNNDNLDMFMASAIRSQQVL	O
12	PITG_22870	PiAvr2	Avr2	MGFSLKDTLKKLNPIKAAVKAKDKAKEVTEKITDADWKKLVEHLKIKGDKRS	O
13	PPTG_18824	PpAvr2a	Avr2	MTFSLGDVLKKLNPVKAVKKAKEKVQDATDKITEPNWKDLVVHLAVKGDDKG	O
14	PPTG_19177	PpAvr2b	Avr2	MTLNLGDVLKKLNPVKAVKKAKEKVQDATDKITDPNWKDLVVHFAVRGDDKG	O
15	PPTG_19866	PpAvr2c	Avr2	MGGFKDKLKAVAEKLNPVKAAEKAKDKAKEIKDKVLESDWDKLVKHLQIHGDNKG	O
16	PHYCA_17162	PcAvr2a	Avr2	MGFSDTLKKANPLKLVKKGTKLTAEQAAKVKEALKDAADYQKMIENANKLIRSD	-
17	PHYCA_17159	PcAvr2b	Avr2	MGFGDTLKKANPLKLVKKGTKLTAEQAAKVKEALKDAADYQKMIENANKLIRSD	-
18	PITG_14371	PiAvr3a	Avr3a	MAPNFNLANLNEEMFNVAALTERADAKKLAKQLMGNDKLADAAYMWWQHNRVTLDQIDTFLKLASRKTQGAKYNQIYNSYMMHLGLTGY	O
19	PHYCA_113768	PcAvr3a_a	Avr3a	MGLTDLFKTEKAAVKKLAKAIMADPSKADEVYKKWEAKKYTLTQMSNFLKSKTKGKYDQVYNGYVIHLDH	-
20	PHYCA_114125	PcAvr3a_b	Avr3a	MGFLEKAAVKKMAKAIMADPNKADEVYKKWADKGYTLTQMSNFLKSKTAGKYDRVYNGYVIHLDY	O
21	PHYCA_114012	PcAvr3a_c	Avr3a	MGLTDLFKTEKAAVKKMAKAIMADPSKADDVYQKWADKGYTLTQLSDFLKSKTRGKYDRVYNGYAIHLDY	-
22	PPTG_24440	PpAvr3a_a	Avr3a	MGLADWLEKSNAKKLAKEILKGHTTSNAAYTEWAQKGYTLNKLKQLLDIEKKDKYLSVYNGYVSHLYQL	-
23	PHYCA_114071	PcAvr3a_d	Avr3a	MDLTDVFETKKAAVKKLAKEVMADNRRAKDVFQLWKEKGYTLDELNTFLKSAKYQHVYNQYMIFRGYV	-
24	PHYCA_8132	PcAvr3a_e	Avr3a	MGFTDLFKNEKAAVKKMAKAIMADPSKADEVYNTWAAKKYTLTQLSNFLKSKTAGKYDRVYNGYALHLDY	-
25	POM69409.1	PpalAvr3a_a_1	Avr3a	MTPNINFNLAQLTERADAKKLAKQLMGNDKLAKAAYIWWQHNGVTLTKLDEFLKLASRKTQGRKYDQIYNAYMMHLGYTGV	O
26	POM68464.1	PpalAvr3a_b	Avr3a	MTPNFNLAELTKKKHAAALAEQLMGDHKLADAAYIWWQHNRVTLDKLDKFLKLASKKTKANYDQLYNGYMMHLGLTAY	O
27	POM69409.1	PpalAvr3a_a_2	Avr3a	MTPNFNLAELTKRNDAKKLADKLMGDHRLANAANIWWQHHEITLDKLDEFLKLASRKTQGRKYDQIYNGYTMHLGLTGY	O
28	POM69409.1	PpalAvr3a_a_3	Avr3a	MTPSFNLAQLTKRKDAKNLATQLMGNDKLAKAAYVWWQHNDVTLTKLDAFLKLASHKTQGRKYDQIYNAYMMHLGYTGV	O
29	PITG_07558	PiAvr8	Avr8	MTDTTLDSEDNNEDSGERSVWKHVKVRWWLETEKSDDFVRKALKLNGLDDTAMKAHKNYKYYAYFAKKAEDYLFNKWLRNHVPTFEAWKSLNLGKITKADQLKEIANTKNFISYSRFVKQYDDNVVSTLNAGYNPPVVAVARGASEAEITARTMIMASARRDDDVAKVLLGLTKPGYPRRVLDGNALTQHDEYKYYQLFKEAKTS	O
30	PHYCA_97196	PcAvr8a	Avr8	MGSLITKIRTAFSKKARVDEWAKAEKSDDFVRKALKLENVADDHLWAMKNYPYYLRFLEKAEAKKINDWLIGDVPTYSAWVKLGLGSIDDIEKVKTTAAFKTYEKFVKEYDDQAIALWKDYNIPIPVATATSPTEMNARMDILAAAKRGDAYAKQVLGLDNVTGSALVSHVNYQYFEHYRRTVKRLQDPKKKLNRLPTITER	O
31	PHYCA_133657	PcAvr8b	Avr8	MGFLSNLVKEAKVRWWLETGKSESQVKKAQLLDELSGKAFETNTKLLQKFATKAYANKLNKWLQDDATTYSVWKILKLENVSSKQLKSSPAYRTYVDYVNQFDDLSQRKWGAYKLPEMVGSSKTEMMAKSSIWGEAKRSEAYVKMALDMEGNW-	O	weak HR
32	PHYCA_101579_101354	PcAvr8c	Avr8	MGITIPTKVKLFWWLEFKNKPNSYVKTKLGLDKLDDVALKNHKNYPLYLKYKDKREEYQLWELAGRSYSTYKFWKNEGLDKIITLRRGMTYDDIAAEIKKLEGTEPFRVYKRYAKEFDQHRLANFGSGYYRDTYFIDENASTVEKYVRAHVWADAKIDKRYVQEFLGMRWAKPEVVNRNPYYRYYLKMSNQSP	-	Auto cell death
33	PPTG_08692	PpAvr8a	Avr8	MASTAPKVEGINENSAERGLWKHIKVRWWLESEAPDAYVKKMLKLNGLDNAALKAHKNYKYYAYFARKSEDYLLNKWLRTDITTFDAWKNLKLDRITHRNQLNQVENTENFRVYSRYVKQFNANVASTLDAGYTPRAVMVARGSTDAEMTARTLIMAKAGIDDKVAKVLLGMTVPGHPTIPLRGNDLMKHVDYKFFTLFLEKKAKVTPGK	O	weak HR
34	PPTG_18711	PpAvr8b	Avr8	MGNMFKTMWKYVKVQLWLETKMSKEYVKTALKLDGLDDADIKTHKNYKYYSYFADKSEEYRLIGWLQKDYTTFDAWHKELNLNRITQANELNKVEATDAFRVYKHYVNMHDTLIVRQMNIGNAPEVVVSRGATAAEMTARTIIMAKAKRSDKAAQRLLGLIDPHNSRVLLTGEALTRHVDYQYFKLFRKLKKEFTSLNLQTMKKYSNY	O
35	KAG2786055.1	PcacAvr8b	Avr8	MGVWTYAKALWWAETGKSDAYVRKVLKLNDLDDAARKSNKYYAYFVDRTEWYQIVKWLQNDFTTFQVWKTLKLDKITKYQQLDDILDTDAFRLYMRYVKHFNRGVVSKLKNGYKPDGVMVERGASDAEMWVRALIMAQAGMKDEYAQVLLGLTIPDRFVNKLLKGDALKAHPDYKYFKLFLEAKAETRRDAEINKIRMRANA-	-
36	POM63697.1	PpalAvr8a	Avr8	MSLWTRIKVRWWLETGQTDEYVSKALKLDDVDDATLKTKKNYKHYKYFTKKSLDYRINKWLRKDTTTFTVWKELGFSHITTVNQLDDIMDIPNFHIYTRYVNDFDTNVERTLVAGYNPPAVMIDPWVSEAEMVMRTTIMAQAGRDDNVAKVLLGMTVPGKPREVLQGDALKEHGAIPYFQMFQKLKKELSVPTTTT	-
37	POM74542.1	PpalAvr8b	Avr8	MSFLAYTKVRWWLETGKSDDYVRKALKLNGLDDATMKTRKNYRYYEYFARKSLDYQIHNWIRQEYTTFNIWTEMGFHDVVLKTSDDLVKLMSTANGNIYKQYVNKADFYADASLKAGYKPPISMDSYATEAEKIARTTIMANAHTKDAVAKVLLGLTVPGKPMMTLQGDALKKHRGYQYFEYFQNLKSLDMKDKQYAEKYEALFQKLKSLNAANAYR	-
38	POM58761.1	PpalAvr8c_1	Avr8	MGFIKYLKVQWWLETGKSDDHVRKALKLNGLDDATMKTRPNYKYYKYFARKLVDYKLAKWLQKKFTTFNVWTKLGFQDVTLKTSDDLLKLLNTANGKIYKRYVNGVDYRARKSLYAGYKPSISIDSYATEAEMIARTTIMANAEKNEAVAKALLGLTVPGKPLTTLKNDALQKHRGYTYFEYYQGLRGLKVNDKENFEKLFQTLKTRNAATTA	-
39	POM58761.1	PpalAvr8c_2	Avr8	MGFIKYLNVLWWLETGKSDDHVRKALKLNGLDDATMKTRPNYKYYKYFARKLVDYKLAKWLQKKFTTFNVWTKLGFQDVTLKTSDDLLKLLNTANGKIYKRYVNGVDYRARKSLYAGYKPSISIDSYATEAEMIARTTIMANAEKNEAVAKALLGLTVPGKPLTTLKNDALQKHRGYTYFEYYQGLRGLKVNDKENFEKLFQTLKTRNAATTA	-
40	PHYSO_286372	PsAvr8c_2	Avr8	MENLWTRFYNALRVRWWLETEKTDEQVMKILKLTGRSGDELTGHPNFKTFAKFAKTAEKYKLGEWYRSRVSTYDAWVKLGLEDVPLHLVHQTPAYWTNYHYVNMFDYYASIAMKNRHQPPVLVSEKASPKEMSRVLIWAATERSDDYVKAALGILGKSGEALTTHAGYKYYKQYLGHLEEAKKVKTATTAA	-
41	PHYSO_286355	PsAvr8a	Avr8	MGDTDVPVTHNKDGNVKQRTGGSSLLYKMKKNAQVTWWLEAGKSDDYVRGALKLKGLKGDALKSHKNYRYYAHFVKKSEEYQLNKWLTRDVTTYMAWEMLGFQQITKADELPLIKMTDEFRLYKRYVNDFDTYALRTMKAGYEPPRVMVSRGATDAEMTARTLIMAEAGRSDAYAKLALGMTEGYNRMKVLKCAALEGQKDFNYFLLFVREREPAMRDELARLEKLAKLSKRQRKAQREMLDDLKLIEKYRQRNGGAQ	O
42	PHYSO_288926	PsAvr8b_1	Avr8	MSFFSDLFKKINVRWWLETGKSEKDVMKALKLDTLSGAALMSNYKYFQKFVTKAEFNRLNKWLTRDVSTFQAWKNLGLHKLDENQLVNAPGLATYKRYVKMYDDDVILQLGAYKVPSMTSVGSPAEMAVKTRLWAQSKRSVDYVKKVLSLEGLSDSAMKSHENYKYFKQFLDARKSVN	O
43	PHYSO_286372	PsAvr8c_1	Avr8	MENLWTRFYNALRVRWWLETKKTDEQVMKILKLTGRSGDELTGHPTFKTFAKFAKTAEKYKLGEWYRSRVSTYDAWVKLGLEDVPLHLVHQTPAYWTNYHYVNMFDYYASIAMKNRHQPPVLVSEKASPKEMSRVLIWAATERSDDYVKAALGILGKSGEALTTHAGYKYYKQYLGHLEEAKKVKTATTAA	-
44	PITG_07569	PiAvramr1	Avramr1	MLGGANMFNIKKLEDALNDTTYAKTLFRRWKRSGVNEDTITTKFKNLQISLDENALELIQSYRIWLNAHATKTNPKLFDRAKIKKALEDGTYANVLYGRWKRYGFESDDVFKRFQRMGVNKDDNLYQVYKNYVTWLNVHHPLKKSTLTTPEAFLFYPSRIQRAKSDPAFAETLFAKWKSSGLDEGPVYKKLWDMGLKKDNAIYKLYTDYVLWLDKHFPLPAKATN	O
45	PHYCA_10713	PcAvramr1a	Avramr1	MLAGKNMFNAEKIEKALQDTSYAKTLFRRWKRYKVEHGAAFDKLIKFNIGKDDKVFGLYKNYVSWLEKHHPLGAETGGGPNLFSKAKLDKAMKDPKYENTMFGRWKRQGFESDAAYNKLLAFNLASDADVYKIYTKYVTWLNIHHPLAKTRKTTAKDFLFNVDRIARAKKDSEFAETLFKKWKTSGLDEKPVYLKLWDMGLKTDDELYKLYKNYVKWLDIHYPLPAKAT	O
46	PPTG_08943	PpAvramr1a	Avramr1	MFDIKKLDDALNDAGYANTLFQRWKSHDFDDAKVLEKLKSMGISINEDAEWLLQSYRTYLNSHSLKGDPKLLFDRAKIDEALTNGKSTNALFGKWKSYGYESDDVFKKFQTMGVRTDDSLYNVYLKYLAWLNTHHPLKYTKPTTADEFLFDSTRIKNAISDSVFAEKLFAKWKGSGLDERPVYDKLWKMGLKNDDDLYQLYRSYVFWLDEHFPLPAKASTP	O
47	KAG2780357.1	PcacAvramr1a	Avramr1	MLAGANMFNIKKLEEALNNAGYANTLFQRWKRHGVDEAKVSRKFKNMGISTDTNAQELAQSYRTWLSAHAANIDLKLFDKAMIYGTLEDVTRAKELFGKWKSYGLESDNVFKTFQTMGVRNDNDLYKVYLNYVAWLNTHHPLKETKLTSAQEFLFHPSRIKRAKSDSAFAENLFAKWKDSGLDELPVYNRLWKMGLGKDNAIYDMYRNYVFWLDKHFPLPAIATT-	O
48	POM61164.1	PpalAvramr1a_1	Avramr1	MLSGANMFKAKKIEQAIGDASYAKTLFRRWKRNGVDSDGAFKKLREMHKLETDDKVYKLYLNYLAWLEKHHPLGQDLGMKNMFDEAKISKAAKDPTYANNLFGRWKRNNFDMIKVRDQFKAMRITSGNPLYNVYTRYAAWLRIHHPKEGTEKLTPIKFLFDRTRIDRTLVDETFANNLFAKWKASGFDSDGVFKKFQDMGVKYDDDLYKVYKNYYAWLEKYHPLPPL	-
49	POM64456.1	PpalAvramr1b	Avramr1	MDEERLSGANMFNTEKIKQATGDSSYAKTLFQRWKRNGVDSDGAFKKLRVMYNLDTDKNVYNLYVNYFTWLEKHHPRGQDLGIKNMFDKAKISNAAKDPTYANNLFGRWKRNNFDMIKVRDQFKAMRITSGNPLYNVYTRYAAWLRIHHPKEGTELTPIKFLFDRTRIDRTLVDETFANKLFAMWKASGFDSDDVFKKFQTMGVKNDDDLYKVYKNYYTWLEKNHP	O
50	POM61164.1	PpalAvramr1a_2	Avramr1	MDEERLSGANMFKAEKIEQAIGDASYAKTLFRRWKRNGVDSDGAFKKLREMHNLKTDKNVYNLYVNYVAWLEKHHPLGQDLGMKNMFDEAKISKAAKDPTYANNLFGRWKRNNFDMIKVRDQFKAMRITSENPLYNVYTRYAAWLRIHHPKEGTEKLTPIKFLFDRTRIDRTLVDETFANKLFAKWKASGFDSDGVFKKFQEMGVRYDNDLYKVYKNYYAWLEKYHPLPPL	O
51	POM70979.1	PpalAvramr1c	Avramr1	MLSDANMFKAEKIEQAIGDASYAKTLFQRWKRNGVDSDGAFKKLRVMHNLDTDKKVYKLYVNYRAWLEKHHPLGQNLGMKNMFDEAKISKAAKDPTYANNLFGRWKRNNFDMIKVRDQFKTMRITSENPLYNVYKGYVAWLRIHHPKEGTEKLTSMDFLFERTRLGRTLVDETFANKLFAKWKSRNYNSDYVFKKFQAMGVKYDKELYQVYLKYHAWLEKYHPLPPL	-
52	PHYSO_286958	PsAvramr1b	Avramr1	MLAGDKLFDAAKLKRAMDDSKYAETLMKRWKRHGFDIEDAKIRLNASRYAKDEKLNAIYLKYAAWLDTHFSRLPGVKPSGGDDLFNKAKLEVAIKDGNYKRTLFKEWKTHNYESEAVFKQLNALGRKDFDNTLDRLYVDYVIWLNVHFPHQDTLKLATEPLLFQESMLLKARTDVDYAQSLFWAWKKNFSLEKVTENLKITFANADNMILRGYTNWLINNFH	-
53	PITG_21190	PiAvramr3	Avramr3	MIMTEIIKRLRTATWIETGRTDDYVKTTLRLDNLSGAALKSAPNYMYYEHFLNALEGRILEVWLSKGVPTKNVWATYKLDDIPTAQLNDNDGFKTYLRYAIMEDNKIFKLKSNDQPVAIDYSGTPAELKAKVDMWVSLKRPNYYVSRMLDLDRRSINTFRRSPKFQLYEMFQMKTWAAKGYPTNYFWKDHRLHEVPQQQLQNNGLYKKFVRYAMMVDDESFKNGKTVKITADESKAEISTKVTIWASKDRPFEYVKKVLGLRGAADTTNANYKYFEDFLLQTNRPKKSK	nd
54	KAG2761177.1	PcacAvramr3a	Avramr3	MIIPELTKWFRTTYWLNSGKTDEYVKKALGLDNLSGATLKSAPNYVYYEHFLDALEGRVLKSWLAEGKSTKSVWADYKLEDIPTAQLKDNEGFKTYLRYAIMEDNYIFKLKSNDQLVKVDYSGTRAEMNAKVDMWISLKRPNWYVKKMLNLDHRSINAFRNSPNYPRYERFEDAMQEVTLKDWLAKGYSTKHILTSYKLHEVPLDKLERNDNYKMYVRYATMVDDEIFNGGKKVKVEADEIPLEVNTKVEIWASKNRPNEYVEEILGLNGAADKTSANYKYYEYFLTLKKG-	nd
55	POM69181.1	PpalAvramr3a	Avramr3	MVDTFLKSMRTSFWLETGKSDEYVKKTLELDNLSEAALKSAPNYQYYEHFLFTREGRMLDEWLLKGIPTREVWTRYNLEGVLVAQLKDNDGFKTYLRYATMEDDKIFKLKSQDKDVTIDYSATPGELNAKVDMWVSLERPSWYVKKMLNLDRRSYDAFRKSANYKLYEKYEYGIEGRKLEKWLLAGIPPKLIWDTYKLDELSPANFRAYQMYIRYGIMHDDEVFKLWKSGKEIKPELGGTSEMEVKVKIWASLKRPDQYVEELLNLDRNALKTSPNYEFYQKFLRGTAATE-	nd
56	PHYSO_286275	PsAvramr3a	Avramr3	MGGFSWLRQQYWLETEKSKSYVKQALGLDGLEGAALKAAPNFVHYDDFVYARQGNILKNWLDEGLTTPQLAKHYKLNDIPAIELKKDTNKYKKLVRFAKMEDEKIFNLRNSDVDVKMVNGGSPAEMEAKLEAWVSARRPRYYVRKMLNLDNRSRKTLLGSKYYSYYGRFLGLTGQKPTLPQKPAVEA-	nd
57	PHYSO_285719	PsAvramr3b	Avramr3	MGDVVTSLVKSIQVQKWFLTGKTDDFVKKALNLNGLSNKAMEARPNYKYYVKFFLKTEPQRFKDWLNEGKGGLPTHWAWARLGLRNMDPATRDQSAAYKAYMRYAKIFDDDMYQRVLKNRRQAFRVVIGPFPDETSVLIRLWVATKRPDWYVEKMLGTLPMAPPGHLGEHYFKEYMHQLMLREQAARKRGK-	nd
58	PITG_21388	PiAvrblb1	Avrblb1	MAFSISKSAEYVKMVLYGFKLGFSPRTQSKTVLRYEDKLFTALYKSGETPRSLRTKHLDKASASVFFNRFKKWYDKNVGPS	O
59	PPTG_04550_04415	PpAvrblb1a_1	Avrblb1	MEERLPSISTIVENIKAFLYGVKIGFSPKTESKLVLRFEEKLFTKIYNAKETPESLRAKYMGTRGNAIFERFDAWYKKKNAANELAPN-	O
60	PPTG_04550	PpAvrblb1a_2	Avrblb1	MLSISTIVENIKAFLYGVKIGFSPKTESKLVLRFEEKLFTKIYNAKETPESLRAKYMGTRGNAIFERFDAWYKKKNAANELAPN-	O
61	PPTG_04550_04415	PpAvrblb1a_3	Avrblb1	MEERLPSISTIVENIKAFLYGVKIGFSPKTESKLVLRFEEKLFTKIYNAKETPESLRAKYMGTRGNAIFERFDAWYKKKNAANELAPN	O
62	PPTG_04415	PpAvrblb1b	Avrblb1	MLSISTIVEKIKAFLYGFKLGFSPKTESKLVLRYEEKLFTKIYNAKETPESLRAKYMGRRGNVVIERFDAWYKKKVAANELAPN	O
63	KAG2787712.1	PcacAvrblb1a	Avrblb1	MASFMANIVEQAKAYYYGIKVGLNPHTESKWVMRYEDELYDSFYKLRETPASIRALYLDRKGILADRYKGWYDNKNKLAANKLARN-	O
64	PITG_20300	PiAvrblb2	Avrblb2	MIEAQEVIQSGRGDGYGGFWKNVAQSTNKIVKRPDIKIGKLIEAAKKAKAKMTKS	O
65	PPTG_18954	PpAvrblb2a	Avrblb2	MAAGQEVVQSTGNGNGGIFKSTLTSINKVVHKPEIKLGGLIEKAKIAQAAKAFKNKATGKK	-
66	PPTG_12798_12790	PpAvrblb2b_1	Avrblb2	MVAGQEVVQSTGNGYGGVFKSAGTSINKVIPRPDSPKMKELLKKANLALAIKNALKKSNK	-
67	PPTG_13757	PpAvrblb2c	Avrblb2	MVAGQEVVQSNYDGVGGIIKAVSQSVNKVTAPIPNIKLQALLEKAKVAKALKNAGKKVTGGKL	-
68	PPTG_12798	PpAvrblb2b_2	Avrblb2	MVAGQEVVQSTGNGYGGVFKSAGTSVNKIIPRPDTADIKKLVEKANLVRLIKNAANKSNK	-
69	PHYSO_530874	PsAvrblb2a	Avrblb2	MFAGQQVVQSGRGNGNGGVWKAPVASINKIINRPDIDVKRYIEAAKKAAGK-	-
70	PITG_16294	PiAvrvnt1	Avrvnt1	MTSTQNLGNSLMRVFSKEATRKYYLDLFKRADFTANLPKLAKKGGPDRLNDALKKLRKAGISEEKFAELKGAAAKYADDWYRIYGKLDPIRA	O
71	PPTG_07192	PpAvrvnt1a_1	Avrvnt1	MASVSEFAKKFFSKKQRYMNLFKKTNEELAKKNYGPDKLKNALKYLKENGVRKEKLAGFSNKADDWEGFWYRTSKLDPIRD	O
72	PPTG_07192	PpAvrvnt1a_2	Avrvnt1	MASVSEFAKKLFSKKQRYMNLFKKTNEELAKKNYGPDKLKNALKYLKENGVRKEKLAGFSNKADDWEGFWYRTSKLDPIRD	O
73	KAG2783509.1	PcacAvrvnt1a	Avrvnt1	MGITDIGNYLTRLVSKSAKQKHYLNLFEQSYDVVAKKGGPNRLKKALVKLRNSGVSEDKLKGLDDAAENYSKEWYRALVNLDPRRV-	O
74	PHYSO_306271	PsAvrvnt1a	Avrvnt1	MNFAKNLYSKIVKKNALKLFTKTNDQLAAKKYSPSHLFDALKTLRKSGVPEEKLVGLLGKADDWSDHWYRTAGHLDPVRN-	O
	*HR cell death triggered when co-expressed with putative corresponding Solanum NLR of defined family
